# Supplementary material
Source: Springer Nature journal article supplement (https://www.springermedizin.de/resource/supplementary/12879_2006_423_MOESM2_ESM.pdf/9448636)

CD4 (cel/mm3)

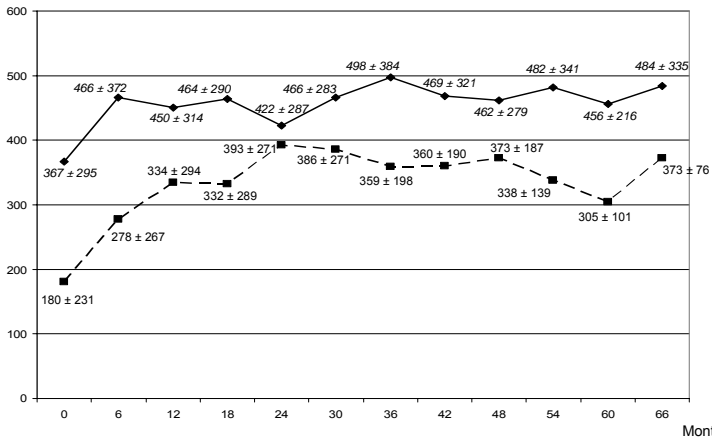

Months

Plasma viral load (log10)

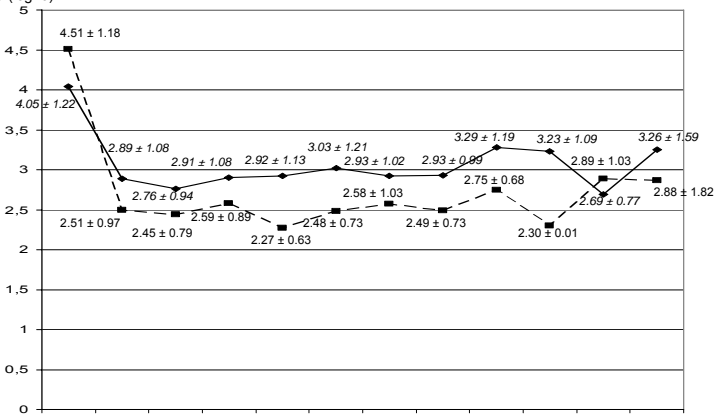

Months

N (Group1):  
N (Group2):

419

36

210

26

164

23

133

23

119

17

89

17

75

13

51

12

48

8

50

6

35

3

18

7

66

2

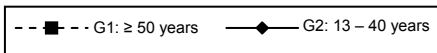

Supplement: MOESM2 [file 9448636]
